# Supplementary material for: COVID-19 Vaccines Safety Tracking (CoVaST): Protocol of a Multi-Center Prospective Cohort Study for Active Surveillance of COVID-19 Vaccines’ Side Effects
Source: MDPI journal article supplement (doi:10.3390/ijerph18157859), 2021-07-25
Supplement: s1 [file s1]

Table S1: CoVaST Instrument.

| 1. Demographic Data                                                     |                                                                                                                                                                                                                                                                                                                                                                                                                                                                                                                                                                                                                                                                               |
|-------------------------------------------------------------------------|-------------------------------------------------------------------------------------------------------------------------------------------------------------------------------------------------------------------------------------------------------------------------------------------------------------------------------------------------------------------------------------------------------------------------------------------------------------------------------------------------------------------------------------------------------------------------------------------------------------------------------------------------------------------------------|
| Gender                                                                  | <input type="radio"/> Female<br><input type="radio"/> Male<br><input type="radio"/> Prefer not to say                                                                                                                                                                                                                                                                                                                                                                                                                                                                                                                                                                         |
| Age                                                                     | <input type="radio"/> Dropdown menu with numbers (18-99)                                                                                                                                                                                                                                                                                                                                                                                                                                                                                                                                                                                                                      |
| Profession                                                              | <input type="radio"/> Physician (M.D.)<br><input type="radio"/> Dentist (D.D.S)<br><input type="radio"/> Nurse (R.N.)<br><input type="radio"/> Pharmacist (PharmD)<br><input type="radio"/> Physiotherapist<br><input type="radio"/> Other (please specify)                                                                                                                                                                                                                                                                                                                                                                                                                   |
| Region                                                                  | <input type="radio"/> All the regions of the participating country should be enlisted here. For EU members, NUTS-3 level categorization should be followed.                                                                                                                                                                                                                                                                                                                                                                                                                                                                                                                   |
| Weight                                                                  | kg                                                                                                                                                                                                                                                                                                                                                                                                                                                                                                                                                                                                                                                                            |
| Height                                                                  | cm                                                                                                                                                                                                                                                                                                                                                                                                                                                                                                                                                                                                                                                                            |
| 2. Medical Anamnesis                                                    |                                                                                                                                                                                                                                                                                                                                                                                                                                                                                                                                                                                                                                                                               |
| Do you have any chronic disease?                                        | <input type="radio"/> Yes<br><input type="radio"/> No                                                                                                                                                                                                                                                                                                                                                                                                                                                                                                                                                                                                                         |
| If "Yes", please specify all chronic diseases you suffer from currently | <input type="radio"/> Allergy<br><input type="radio"/> Asthma<br><input type="radio"/> Blood Disease<br><input type="radio"/> Bowel Disease<br><input type="radio"/> Cancer<br><input type="radio"/> Cardiac Disease<br><input type="radio"/> Chronic Hypertension<br><input type="radio"/> COPD<br><input type="radio"/> Diabetes Mellitus – I<br><input type="radio"/> Diabetes Mellitus – II<br><input type="radio"/> Hepatologic Disease<br><input type="radio"/> Psychological Distress<br><input type="radio"/> Neurologic Disease<br><input type="radio"/> Ophthalmologic Disease<br><input type="radio"/> Renal Disease<br><input type="radio"/> Rheumatoid Arthritis |

|                                                                                                                                                                         |                                                                                                                                                                                                                                                                                                                                                                                                                                                                                                                                                                                                                     |
|-------------------------------------------------------------------------------------------------------------------------------------------------------------------------|---------------------------------------------------------------------------------------------------------------------------------------------------------------------------------------------------------------------------------------------------------------------------------------------------------------------------------------------------------------------------------------------------------------------------------------------------------------------------------------------------------------------------------------------------------------------------------------------------------------------|
|                                                                                                                                                                         | <ul style="list-style-type: none"> <li>○ Thyroid Disease</li> <li>○ Other, please specify</li> </ul>                                                                                                                                                                                                                                                                                                                                                                                                                                                                                                                |
| Do you take any medication currently?                                                                                                                                   | <ul style="list-style-type: none"> <li>○ Yes</li> <li>○ No</li> </ul>                                                                                                                                                                                                                                                                                                                                                                                                                                                                                                                                               |
| If "Yes", please specify the category of the drug                                                                                                                       | <ul style="list-style-type: none"> <li>○ Anti-asthma</li> <li>○ Antibiotics</li> <li>○ Anticoagulant</li> <li>○ Antidepressant</li> <li>○ Antidiabetic</li> <li>○ Antiepileptic</li> <li>○ Antihistamine</li> <li>○ Antihypertensive</li> <li>○ Anti-Reflux</li> <li>○ Anti-venous Insufficiency</li> <li>○ Immunosuppressive</li> <li>○ Cholesterol-lowering</li> <li>○ Common Analgesic</li> <li>○ Contraceptive</li> <li>○ Corticosteroid</li> <li>○ NSAID</li> <li>○ Opioid Analgesic</li> <li>○ Thyroid Hormones</li> <li>○ Other, please specify (the generic name or the market name of the drug)</li> </ul> |
| Do you smoke cigarettes?                                                                                                                                                | <ul style="list-style-type: none"> <li>○ Yes</li> <li>○ No</li> </ul>                                                                                                                                                                                                                                                                                                                                                                                                                                                                                                                                               |
| If "Yes", how many cigarettes do you smoke per day?                                                                                                                     | <ul style="list-style-type: none"> <li>○ Dropdown menu with numbers (0-99)</li> </ul>                                                                                                                                                                                                                                                                                                                                                                                                                                                                                                                               |
| Do you drink alcohol?                                                                                                                                                   | <ul style="list-style-type: none"> <li>○ Yes</li> <li>○ No</li> </ul>                                                                                                                                                                                                                                                                                                                                                                                                                                                                                                                                               |
| If "Yes", how many glasses of (0.5 l) beer per week?<br>If "Yes", how many glasses of (0.2 l) Wine per week?<br>If "Yes", how many glasses of (0.04 l) Spirit per week? | <ul style="list-style-type: none"> <li>○ Dropdown menu with numbers (0-99)</li> <li>○ Dropdown menu with numbers (0-99)</li> <li>○ Dropdown menu with numbers (0-99)</li> </ul>                                                                                                                                                                                                                                                                                                                                                                                                                                     |
| <b>3. COVID-19-related Anamnesis</b>                                                                                                                                    |                                                                                                                                                                                                                                                                                                                                                                                                                                                                                                                                                                                                                     |
| Vaccine Type                                                                                                                                                            | <ul style="list-style-type: none"> <li>○ Oxford–AstraZeneca COVID-19 Vaccine</li> <li>○ Pfizer-BioNTech COVID-19 Vaccine</li> <li>○ Moderna COVID-19 Vaccine</li> <li>○ Janssen Vaccine</li> <li>○ Sputnik V Vaccine</li> </ul>                                                                                                                                                                                                                                                                                                                                                                                     |

|                                                              |                                                                                                                                                                                                                                                                                                                                                                                                                                                                                                                                                                                                                                                                                                                                                                                                                                                                                                                                                                                                                                                                                                                                                                                                                        |
|--------------------------------------------------------------|------------------------------------------------------------------------------------------------------------------------------------------------------------------------------------------------------------------------------------------------------------------------------------------------------------------------------------------------------------------------------------------------------------------------------------------------------------------------------------------------------------------------------------------------------------------------------------------------------------------------------------------------------------------------------------------------------------------------------------------------------------------------------------------------------------------------------------------------------------------------------------------------------------------------------------------------------------------------------------------------------------------------------------------------------------------------------------------------------------------------------------------------------------------------------------------------------------------------|
|                                                              | <ul style="list-style-type: none"> <li>○ Covaxin Vaccine</li> <li>○ Other, please specify</li> </ul>                                                                                                                                                                                                                                                                                                                                                                                                                                                                                                                                                                                                                                                                                                                                                                                                                                                                                                                                                                                                                                                                                                                   |
| Vaccination Date (first dose)                                | <ul style="list-style-type: none"> <li>○ Please select the date from the (Calendar)</li> </ul>                                                                                                                                                                                                                                                                                                                                                                                                                                                                                                                                                                                                                                                                                                                                                                                                                                                                                                                                                                                                                                                                                                                         |
| Have you taken the second dose?                              | <ul style="list-style-type: none"> <li>○ Yes</li> <li>○ No</li> </ul>                                                                                                                                                                                                                                                                                                                                                                                                                                                                                                                                                                                                                                                                                                                                                                                                                                                                                                                                                                                                                                                                                                                                                  |
| Vaccination Date (second dose)                               | <ul style="list-style-type: none"> <li>○ Please select the date from the (Calendar)</li> </ul>                                                                                                                                                                                                                                                                                                                                                                                                                                                                                                                                                                                                                                                                                                                                                                                                                                                                                                                                                                                                                                                                                                                         |
| Have you ever been diagnosed with COVID-19?                  | <ul style="list-style-type: none"> <li>○ Yes</li> <li>○ No</li> </ul>                                                                                                                                                                                                                                                                                                                                                                                                                                                                                                                                                                                                                                                                                                                                                                                                                                                                                                                                                                                                                                                                                                                                                  |
| If "Yes", when were you diagnosed?                           | <ul style="list-style-type: none"> <li>○ Before vaccination</li> <li>○ Between 1st and 2nd dose of vaccine</li> <li>○ After vaccination</li> </ul>                                                                                                                                                                                                                                                                                                                                                                                                                                                                                                                                                                                                                                                                                                                                                                                                                                                                                                                                                                                                                                                                     |
| Please specify the date when you were diagnosed              | <ul style="list-style-type: none"> <li>○ Please select the date from the (Calendar)</li> </ul>                                                                                                                                                                                                                                                                                                                                                                                                                                                                                                                                                                                                                                                                                                                                                                                                                                                                                                                                                                                                                                                                                                                         |
| How do you describe the severity of your COVID-19 infection? | <ul style="list-style-type: none"> <li>○ <b>Mild</b> (no symptoms, or mild upper respiratory tract symptoms, or cough, new myalgia, or asthenia without new shortness of breath or a reduction in oxygen saturation)</li> <li>○ <b>Moderate</b> (prostration, severe asthenia, fever &gt; 38 °C or persistent cough clinical or radiological signs of lung involvement no clinical or laboratory indicators of clinical severity or respiratory impairment)</li> <li>○ <b>Severe</b> (respiratory rate ≥ 30 breaths/min, or oxygen saturation ≤ 92% at a rest state, or arterial partial pressure of oxygen (PaO<sub>2</sub>)/inspired oxygen fraction (FiO<sub>2</sub>) ≤ 300)</li> <li>○ <b>Critical</b> (Respiratory failure Occurrence of severe respiratory failure (PaO<sub>2</sub>/FiO<sub>2</sub> &lt; 200), respiratory distress or acute respiratory distress syndrome (ARDS). This includes patients deteriorating despite advanced forms of respiratory support (non-invasive ventilation (NIV), high-flow nasal oxygen (HFNO)) OR patients requiring mechanical ventilation. OR other signs of significant deterioration hypotension or shock impairment of consciousness other organ failure)</li> </ul> |

|                                                                                                             |                                                                                                                                                                                                                                                                                                                                                                                                                                                                                                                                     |
|-------------------------------------------------------------------------------------------------------------|-------------------------------------------------------------------------------------------------------------------------------------------------------------------------------------------------------------------------------------------------------------------------------------------------------------------------------------------------------------------------------------------------------------------------------------------------------------------------------------------------------------------------------------|
| What were the symptoms you have experienced during the COVID-19 infection?                                  | <input type="radio"/> Fever or chills<br><input type="radio"/> Cough<br><input type="radio"/> Shortness of breath or difficulty breathing<br><input type="radio"/> Fatigue<br><input type="radio"/> Muscle or body aches<br><input type="radio"/> Headache<br><input type="radio"/> New loss of taste or smell<br><input type="radio"/> Sore throat<br><input type="radio"/> Congestion or runny nose<br><input type="radio"/> Nausea or vomiting<br><input type="radio"/> Diarrhea<br><input type="radio"/> Other (please specify) |
| For how many days did you experience the COVID-19 symptoms?                                                 | <input type="radio"/> Dropdown menu with numbers (0-99)                                                                                                                                                                                                                                                                                                                                                                                                                                                                             |
| <b>4. Vaccine Side Effects</b>                                                                              |                                                                                                                                                                                                                                                                                                                                                                                                                                                                                                                                     |
| Within four weeks of receiving the vaccine, have you suffered from any of the following local side effects? | <input type="radio"/> Injection site pain<br><input type="radio"/> Injection site swelling<br><input type="radio"/> Injection site redness<br><input type="radio"/> Other, please specify                                                                                                                                                                                                                                                                                                                                           |
| When did the local side effects emerge?                                                                     | <input type="radio"/> After the first dose only<br><input type="radio"/> After the second dose only<br><input type="radio"/> After both doses                                                                                                                                                                                                                                                                                                                                                                                       |
| If you chose any of the previous side effects, please indicate their duration                               | <input type="radio"/> 1 day<br><input type="radio"/> 2 days<br><input type="radio"/> 3 days<br><input type="radio"/> 5 days<br><input type="radio"/> 1 week<br><input type="radio"/> 2 weeks<br><input type="radio"/> 3 weeks<br><input type="radio"/> 4 weeks<br><input type="radio"/> > 1 month                                                                                                                                                                                                                                   |
| Within four weeks of receiving the vaccine, have you suffered from any of the following side effects?       | <input type="radio"/> None<br><input type="radio"/> Fatigue<br><input type="radio"/> Headache<br><input type="radio"/> Muscle Pain<br><input type="radio"/> Joint Pain<br><input type="radio"/> Fever<br><input type="radio"/> Chills<br><input type="radio"/> Nausea<br><input type="radio"/> Diarrhoea<br><input type="radio"/> Shortness of breath<br><input type="radio"/> Anaphylaxis                                                                                                                                          |

|                                                                                                                                                                                     |                                                                                                                                                                                                                                                                                                                           |
|-------------------------------------------------------------------------------------------------------------------------------------------------------------------------------------|---------------------------------------------------------------------------------------------------------------------------------------------------------------------------------------------------------------------------------------------------------------------------------------------------------------------------|
|                                                                                                                                                                                     | <ul style="list-style-type: none"> <li>○ Swollen lymph nodes</li> <li>○ Mouth tingling</li> <li>○ Loss of taste</li> <li>○ Change of taste</li> <li>○ Halitosis (Oral malodour)</li> <li>○ Oral ulcers / blisters / vesicles</li> <li>○ Bleeding gingiva</li> <li>○ Skin rash</li> <li>○ Other, please specify</li> </ul> |
| When did the systemic side effects emerge?                                                                                                                                          | <ul style="list-style-type: none"> <li>○ After the first dose only</li> <li>○ After the second dose only</li> <li>○ After both doses</li> </ul>                                                                                                                                                                           |
| If you chose any of the previous side effects, please indicate their duration                                                                                                       | <ul style="list-style-type: none"> <li>○ 1 day</li> <li>○ 2 days</li> <li>○ 3 days</li> <li>○ 5 days</li> <li>○ 1 week</li> <li>○ 2 weeks</li> <li>○ 3 weeks</li> <li>○ 4 weeks</li> <li>○ &gt; 1 month</li> </ul>                                                                                                        |
| Have you taken any medications to relieve your side effects?                                                                                                                        | <ul style="list-style-type: none"> <li>○ Yes</li> <li>○ No</li> </ul>                                                                                                                                                                                                                                                     |
| If "Yes", please specify what drug you have used. Use either generic name or market name                                                                                            |                                                                                                                                                                                                                                                                                                                           |
| Do you agree to participate in the longitudinal study evaluating the safety of the vaccines from a long term perspective?                                                           | <ul style="list-style-type: none"> <li>○ Yes</li> <li>○ No</li> </ul>                                                                                                                                                                                                                                                     |
| If yes, give us please your contact e-mail address. Your e-mail address will be automatically stored and removed from the survey so the data you have shared will remain anonymous. |                                                                                                                                                                                                                                                                                                                           |
